# Supplementary material
Source: PubMed Central journal article supplement (PMC2798860)
Supplement: blood-2008-10-182071_1.pdf [file blood-2008-10-182071_1.pdf]

|                             | <b>Forward</b>        | <b>Reverse</b>        | <b>Probe</b> |
|-----------------------------|-----------------------|-----------------------|--------------|
| mMMP9                       | acggttggtactggaagtcc  | ccaacttatccagactcctgg |              |
| mLactoferrin                | tatttctgaggccctgga    | tctcatctcgttctgccacc  |              |
| mCathepsinG                 | ctgactaagcaacggttctgg | gattgtaatcaggatggcgg  |              |
| mC/EBP $\alpha$             | aaagccaagaagtcggtggac | ctttatctcggctcttgccg  |              |
| mElastase 2                 | actctggctgcatgctact   | gccaccaacaatctctga    | #107         |
| mProteinase 3               | agctacccatccccaag     | tcgtgccacctaacaatctt  | #4           |
| mMyeloperoxidase            | ggaaggagacctagagg     | tagcacaggaaggccaat    | #7           |
| mFMS-like tyrosine kinase 3 | gcctattccttgtgaaca    | tgatcgcaaaatttagatat  | #88          |
| mGAPDH                      | gtgttcctacccaatgt     | tgtcatcatactggcaggttc | #80          |
