# Supplementary material
Source: PubMed Central journal article supplement (PMC2798860)
Supplement: blood-2008-10-182071_2.pdf [file blood-2008-10-182071_2.pdf]

|             | <b>Median survival</b> | <b>p value</b> | <b>Hazard ratio</b> | <b>95% confidence interval</b> |
|-------------|------------------------|----------------|---------------------|--------------------------------|
| 3,000 cells | 34 days                |                |                     |                                |
| 300 cells   | 46.5 days              | 0.0142         | 6.494               | 1.455-28.98                    |
| 30 cells    | 120 days               | 0.0001         | 32.88               | 5.575-194.0                    |

P values, hazard ratio and confidence interval were calculated between mice injected with 3,000 and 300 cells and mice injected with 3,000 and 30 CD34<sup>+</sup>, c-kit<sup>+</sup>, FcγRIII/II<sup>+</sup>, Gr1<sup>int</sup> cells. The p value was calculated using the Log-rank (Mantel-cox) test.
